# Supplementary material
Source: PubMed Central journal article supplement (PMC5817453)
Supplement: jamadermatol-153-1249-s001.pdf [file jamadermatol-153-1249-s001.pdf]

ClinicalTrials.gov Protocol Registration and Results System (PRS) Receipt  
Release Date: November 30, 2016

ClinicalTrials.gov ID: NCT02054325

---

## Study Identification

Unique Protocol ID: CEP 4127.2012

Brief Title: Study Protocol Comparing Polidocanol Versus Hypertonic Glucose for Treatment of Reticular Veins

Official Title: A Randomized Triple-blind Study Protocol Comparing Polidocanol Versus Hypertonic Glucose for Sclerotherapy in Treatment of Reticular Veins at the Lower Limbs.

Secondary IDs:

## Study Status

Record Verification: November 2016

Overall Status: Completed

Study Start: September 2012

Primary Completion: December 2014 [Actual]

Study Completion: December 2014 [Actual]

## Sponsor/Collaborators

Sponsor: UPECLIN HC FM Botucatu Unesp

Responsible Party: Principal Investigator

Investigator: Dr Matheus Bertanha [mbertanha]

Official Title: Professor

Affiliation: UPECLIN HC FM Botucatu Unesp

Collaborators: Fundação de Amparo à Pesquisa do Estado de São Paulo

## Oversight

FDA Regulated?: No

IND/IDE Protocol?: No

Review Board: Approval Status: Approved

Approval Number: CEP 4127.2012

Board Name: Comitê de Ética em Pesquisa da Faculdade de Medicina de Botucatu

Board Affiliation: Conselho Nacional de Saúde (CONEP)

Phone: +55 14 3880-1545

Email: tsarden@fmb.unesp.br

Data Monitoring?: No

Plan to Share IPD?: Undecided

We intend to present data when publish the original article.

Oversight Authorities: Brazil: National Committee of Ethics in Research

## Study Description

**Brief Summary:** It will be done a randomized triple-blind study comparing 0,2% polidocanol versus 75% hypertonic glucose of sclerotherapy in lower limbs´ reticular veins. It will be included only adult women with reticular veins on the side of the thighs and mild venous insufficiency (CEAP 1). The primary endpoint will be efficacy, and secondary will be safety.

**Detailed Description:** Background. The prevalence of chronic venous disease is high in the general population, mainly in young women, and in milder cases the usual complaint is aesthetic. Various techniques are used for treatment of mild varicose disease, including surgical treatment, laser ablation and sclerotherapy. Reticular veins are those with less than 3mm diameter, bluish and important contribution to the aesthetic damage, and sometimes they are related to local pain and recurrence after treatment of telangiectasias. There is no consensus in the literature about the effectiveness of treatment with sclerotherapy, despite of being an usual procedure with different chemicals.

Methods and design. One hundred lower limbs of healthy women between 18 and 69 years will be triple blind randomized to receive treatment with polidocanol 0.2% diluted in 70% hypertonic glucose versus 75% hypertonic glucose for sclerotherapy treatment of reticular veins. The patients will be examined and clinically classified. It will be included patients with reticular veins sited at out's thigh/leg, measuring at least 10cm long, and only one extremity will be included per patient. The patients with varicose disease CEAP 2 or more will not be included. The treatment will be carried out in only one session and the medication volume not exceeding 5 ml. Clinical follow-up protocols will be filled on regular visits on days 0 - 7 - 60 concomitantly with photograph documentation. Supplementary examination for venous mapping with ultrasound pretreatment is performed for all patients.

Discussion. This prospective controlled double-blind randomized trial aims to verify and compare the efficacy and safety for sclerotherapy treatment of reticular veins of the lower limbs. The results may help physicians to choose the best sclerotherapy treatment for reticular veins.

## Conditions

Conditions: Varicose Veins

Keywords: Sclerotherapy  
varicose veins  
veins

## Study Design

Study Type: Interventional

Primary Purpose: Treatment

Study Phase: Phase 4

Intervention Model: Parallel Assignment

Number of Arms: 2

Masking: Double Blind (Subject, Caregiver, Investigator, Outcomes Assessor)

Allocation: Randomized

Endpoint Classification: Efficacy Study

Enrollment: 106 [Actual]

## Arms and Interventions

| Arms                                                                                                                                                                                             | Assigned Interventions                                                                                                                                                                                                                                                                                                                                                                                                                           |
|--------------------------------------------------------------------------------------------------------------------------------------------------------------------------------------------------|--------------------------------------------------------------------------------------------------------------------------------------------------------------------------------------------------------------------------------------------------------------------------------------------------------------------------------------------------------------------------------------------------------------------------------------------------|
| <p>Active Comparator: Polidocanol with Glucose<br/>An application session 0.2% Polidocanol + 70% Glucose to treat reticular veins of the lower limb selected, with a maximum volume of 5 ml.</p> | <p>Drug: Polidocanol with Glucose<br/>An application session 0.2% Polidocanol + 70% Glucose to treat reticular veins of the lower limb selected, with a maximum volume of 5 ml. Return to a week to investigate the adverse effects and 2 months for proof of efficacy and adverse effects</p> <p>Other Names:</p> <ul style="list-style-type: none"><li>• Dodecylpolyethyleneglycolether</li><li>• Aethoxysklerol</li><li>• Varithena</li></ul> |
| <p>Active Comparator: Glucose<br/>An application session 75% Glucose to treat reticular veins of the lower limb selected, with a maximum volume of 5ml.</p>                                      | <p>Drug: Glucose<br/>An application session 75% Glucose to treat reticular veins of the lower limb selected, with a maximum volume of 5 ml. Return to a week to investigate the adverse effects and 2 months for proof of efficacy and adverse effects</p>                                                                                                                                                                                       |

| Arms | Assigned Interventions     |
|------|----------------------------|
|      | Other Names:<br>• Dextrose |

## Outcome Measures

[See Results Section.]

## Eligibility

Minimum Age: 18 Years

Maximum Age: 69 Years

Gender: Female

Accepts Healthy Volunteers?: No

Criteria: Inclusion Criteria:

- females
- with at least 10 cm from the lateral reticular veins of the leg or thigh of the leg
- clinical classification of chronic venous disease C1(mild venous disease),
- minimum age of 18 year-old and maximum age 69 year-old
- agreement with the study
- signing the free and informed consent ( IC)
- not use anticoagulant drugs .

Exclusion Criteria:

- male
- varicose disease in any quantity or location with clinical classification of chronic venous disease different of C1(mild venous disease)
- restrict mobility
- arterial insufficiency
- be allergic to any substance that may be related to the study drugs
- any cause of dermatitis on application site
- free of comorbidities clinically serious as diabetes mellitus, heart failure, respiratory failure, uncontrolled hypertension with medication, and uncontrolled hypothyroidism
- pregnancy
- previous deep vein thrombosis (DVT)
- family history of DVT
- thrombophilia
- do not agree with the search terms

## Contacts/Locations

Study Officials: Matheus Bertanha, Professor  
Study Principal Investigator  
UPECLIN

Locations: Brazil  
School of Medicine at Botucatu- Paulista State University- UNESP, São Paulo, Brazil  
Botucatu, SP, Brazil, 18607030

## References

Citations:

Links:

Study Data/Documents:

## Study Results

### Participant Flow

|                        |                                                                                                                                                                                                                     |
|------------------------|---------------------------------------------------------------------------------------------------------------------------------------------------------------------------------------------------------------------|
| Pre-Assignment Details | Some patients (n=6) were withdrawn because did not appear at the previous scheduled appointments, and were replaced for new ones. In order to avoid loss of individuals we have decided to include 6 more patients. |
|------------------------|---------------------------------------------------------------------------------------------------------------------------------------------------------------------------------------------------------------------|

### Reporting Groups

|                          | Description                                                                                                                                                                                                                                                                                                                                                                                                                            |
|--------------------------|----------------------------------------------------------------------------------------------------------------------------------------------------------------------------------------------------------------------------------------------------------------------------------------------------------------------------------------------------------------------------------------------------------------------------------------|
| Polidocanol With Glucose | <p>An application session 0.2% Polidocanol + 70% Glucose to treat reticular veins of the lower limb selected, with a maximum volume of 5 ml.</p> <p>Polidocanol with Glucose: An application session 0.2% Polidocanol + 70% Glucose to treat reticular veins of the lower limb selected, with a maximum volume of 5 ml. Return to a week to investigate the adverse effects and 2 months for proof of efficacy and adverse effects</p> |
| Glucose                  | <p>An application session 75% Glucose to treat reticular veins of the lower limb selected, with a maximum volume of 5ml.</p> <p>Glucose: An application session 75% Glucose to treat reticular veins of the lower limb selected, with a maximum volume of 5 ml. Return to a week to investigate the adverse effects and 2 months for proof of efficacy and adverse effects</p>                                                         |

Overall Study

|                   | Polidocanol With Glucose | Glucose |
|-------------------|--------------------------|---------|
| Started           | 51                       | 55      |
| Completed         | 43                       | 50      |
| Not Completed     | 8                        | 5       |
| Lost to Follow-up | 8                        | 5       |

Baseline Characteristics

Reporting Groups

|                          | Description                                                                                                                                                                                                                                                                                                                                                                                                                            |
|--------------------------|----------------------------------------------------------------------------------------------------------------------------------------------------------------------------------------------------------------------------------------------------------------------------------------------------------------------------------------------------------------------------------------------------------------------------------------|
| Polidocanol With Glucose | <p>An application session 0.2% Polidocanol + 70% Glucose to treat reticular veins of the lower limb selected, with a maximum volume of 5 ml.</p> <p>Polidocanol with Glucose: An application session 0.2% Polidocanol + 70% Glucose to treat reticular veins of the lower limb selected, with a maximum volume of 5 ml. Return to a week to investigate the adverse effects and 2 months for proof of efficacy and adverse effects</p> |
| Glucose                  | <p>An application session 75% Glucose to treat reticular veins of the lower limb selected, with a maximum volume of 5ml.</p> <p>Glucose: An application session 75% Glucose to treat reticular veins of the lower limb selected, with a maximum volume of 5 ml. Return to a week to investigate the adverse effects and 2 months for proof of efficacy and adverse effects</p>                                                         |

Baseline Measures

|                                                                                          |                         | Polidocanol With Glucose | Glucose         | Total           |
|------------------------------------------------------------------------------------------|-------------------------|--------------------------|-----------------|-----------------|
| Overall Number of Participants                                                           |                         | 43                       | 50              | 93              |
| Age, Categorical Measure<br>Type: Count of Participants<br>Unit of participants measure: | Number Analyzed         | 43 participants          | 50 participants | 93 participants |
|                                                                                          | <=18 years              | 0 0%                     | 0 0%            | 0 0%            |
|                                                                                          | Between 18 and 65 years | 43 100%                  | 50 100%         | 93 100%         |
|                                                                                          | >=65 years              | 0 0%                     | 0 0%            | 0 0%            |

|                                                                                                           |                 | Polidocanol With Glucose | Glucose         | Total           |
|-----------------------------------------------------------------------------------------------------------|-----------------|--------------------------|-----------------|-----------------|
| Gender, Male/<br>Female<br><br>Measure Type:<br>Count of Participants<br>Unit of participants<br>measure: | Number Analyzed | 43 participants          | 50 participants | 93 participants |
|                                                                                                           | Female          | 43 100%                  | 50 100%         | 93 100%         |
|                                                                                                           | Male            | 0 0%                     | 0 0%            | 0 0%            |

## Outcome Measures

### 1. Primary Outcome Measure:

|                     |                                                                                                                                                                                                                                    |
|---------------------|------------------------------------------------------------------------------------------------------------------------------------------------------------------------------------------------------------------------------------|
| Measure Title       | Efficacy in Treating Reticular Veins by Photographs: Mean Percent Reticular Vein Disappearance Two Months After Treatment.                                                                                                         |
| Measure Description | Photographs were performed pretreatment and two months after the treatment, these were analyzed for efficacy in treat reticular veins by two blind analyzers objectively with measurement through the use of free software ImageJ. |
| Time Frame          | Mean Percent of reticular vein disappearance two months after treatment                                                                                                                                                            |
| Safety Issue?       | No                                                                                                                                                                                                                                 |

Analysis Population Description  
[Not Specified]

### Reporting Groups

|                          | Description                                                                                                                                                                                                                                                                                                                                                                                                                            |
|--------------------------|----------------------------------------------------------------------------------------------------------------------------------------------------------------------------------------------------------------------------------------------------------------------------------------------------------------------------------------------------------------------------------------------------------------------------------------|
| Polidocanol With Glucose | <p>An application session 0.2% Polidocanol + 70% Glucose to treat reticular veins of the lower limb selected, with a maximum volume of 5 ml.</p> <p>Polidocanol with Glucose: An application session 0.2% Polidocanol + 70% Glucose to treat reticular veins of the lower limb selected, with a maximum volume of 5 ml. Return to a week to investigate the adverse effects and 2 months for proof of efficacy and adverse effects</p> |
| Glucose                  | <p>An application session 75% Glucose to treat reticular veins of the lower limb selected, with a maximum volume of 5ml.</p> <p>Glucose: An application session 75% Glucose to treat reticular veins of the lower limb selected, with a maximum volume of 5 ml. Return to a week to investigate the adverse effects and 2 months for proof of efficacy and adverse effects</p>                                                         |

### Measured Values

|                                 | Polidocanol With Glucose | Glucose |
|---------------------------------|--------------------------|---------|
| Number of Participants Analyzed | 43                       | 50      |

|                                                                                                                                                                                                                                       | Polidocanol With Glucose | Glucose       |
|---------------------------------------------------------------------------------------------------------------------------------------------------------------------------------------------------------------------------------------|--------------------------|---------------|
| Efficacy in Treating Reticular Veins by Photographs:<br>Mean Percent Reticular Vein Disappearance Two<br>Months After Treatment.<br><br>Mean (Standard<br>Deviation)<br><br>Unit of measure: % of Reticular Veins that<br>Disappeared | 95.17 (9.09)             | 85.40 (17.04) |

## 2. Secondary Outcome Measure:

|                     |                                                                                                                                                                                                                                                                                                                                                                                                                                                                                                               |
|---------------------|---------------------------------------------------------------------------------------------------------------------------------------------------------------------------------------------------------------------------------------------------------------------------------------------------------------------------------------------------------------------------------------------------------------------------------------------------------------------------------------------------------------|
| Measure Title       | The Safety of the Treatment: Mean Percent of Skin Hyperpigmentation Two Months After Treatment                                                                                                                                                                                                                                                                                                                                                                                                                |
| Measure Description | Skin hyperpigmentation was defined as a brownish hue stain superimposing the previous treated vein site (by visual photographic analyses). Skin hyperpigmentation was firstly evaluated according to its occurrence and labeled as "Yes" or "No". Afterwards, when there was stain in the previous treated area, a line was drawn on the stain with Image J software, and the Mean Percent of Skin Hyperpigmentation was proportionally compared with length of vein treated, previous measure (mean and SD). |
| Time Frame          | Two months after treatment.                                                                                                                                                                                                                                                                                                                                                                                                                                                                                   |
| Safety Issue?       | Yes                                                                                                                                                                                                                                                                                                                                                                                                                                                                                                           |

Analysis Population Description  
[Not Specified]

## Reporting Groups

|                          | Description                                                                                                                                                                                                                                                                                                                                                                                                                     |
|--------------------------|---------------------------------------------------------------------------------------------------------------------------------------------------------------------------------------------------------------------------------------------------------------------------------------------------------------------------------------------------------------------------------------------------------------------------------|
| Polidocanol With Glucose | An application session 0.2% Polidocanol + 70% Glucose to treat reticular veins of the lower limb selected, with a maximum volume of 5 ml.<br><br>Polidocanol with Glucose: An application session 0.2% Polidocanol + 70% Glucose to treat reticular veins of the lower limb selected, with a maximum volume of 5 ml. Return to a week to investigate the adverse effects and 2 months for proof of efficacy and adverse effects |
| Glucose                  | An application session 75% Glucose to treat reticular veins of the lower limb selected, with a maximum volume of 5ml.<br><br>Glucose: An application session 75% Glucose to treat reticular veins of the lower limb selected, with a maximum volume of 5 ml. Return to a week to investigate the adverse effects and 2 months for proof of efficacy and adverse effects                                                         |



### Measured Values

|                                                                                                                                                                                   | Polidocanol With Glucose | Glucose      |
|-----------------------------------------------------------------------------------------------------------------------------------------------------------------------------------|--------------------------|--------------|
| Number of Participants Analyzed                                                                                                                                                   | 43                       | 50           |
| The Safety of the Treatment: Mean Percent of Skin Hyperpigmentation Two Months After Treatment<br>Mean (Standard Deviation)<br>Unit of measure: Percent of Skin Hyperpigmentation | 5.75 (7.02)              | 9.66 (11.67) |

### Reported Adverse Events

|                        |                                                                                                                                                                                                                                                                               |
|------------------------|-------------------------------------------------------------------------------------------------------------------------------------------------------------------------------------------------------------------------------------------------------------------------------|
| Time Frame             | Right after two months post procedure                                                                                                                                                                                                                                         |
| Additional Description | Hyperpigmentation: Linear measure above the projection area of hyperpigmentation post procedure. The length of this line was provided by the Image J software (ImageJ is a public domain, Java-based image processing program developed at the National Institutes of Health) |

### Reporting Groups

|                          | Description                                                                                                                                                                                                                                                                                                                                                                                                                     |
|--------------------------|---------------------------------------------------------------------------------------------------------------------------------------------------------------------------------------------------------------------------------------------------------------------------------------------------------------------------------------------------------------------------------------------------------------------------------|
| Polidocanol With Glucose | An application session 0.2% Polidocanol + 70% Glucose to treat reticular veins of the lower limb selected, with a maximum volume of 5 ml.<br><br>Polidocanol with Glucose: An application session 0.2% Polidocanol + 70% Glucose to treat reticular veins of the lower limb selected, with a maximum volume of 5 ml. Return to a week to investigate the adverse effects and 2 months for proof of efficacy and adverse effects |
| Glucose                  | An application session 75% Glucose to treat reticular veins of the lower limb selected, with a maximum volume of 5ml.<br><br>Glucose: An application session 75% Glucose to treat reticular veins of the lower limb selected, with a maximum volume of 5 ml. Return to a week to investigate the adverse effects and 2 months for proof of efficacy and adverse effects                                                         |

### Serious Adverse Events

|       | Polidocanol With Glucose | Glucose              |
|-------|--------------------------|----------------------|
|       | Affected/At Risk (%)     | Affected/At Risk (%) |
| Total | 0/43 (0%)                | 0/50 (0%)            |

## Other Adverse Events

Frequency Threshold Above Which Other Adverse Events are Reported: 1%

|                                        | Polidocanol With Glucose | Glucose              |
|----------------------------------------|--------------------------|----------------------|
|                                        | Affected/At Risk (%)     | Affected/At Risk (%) |
| Total                                  | 22/43 (51.16%)           | 31/50 (62%)          |
| Skin and subcutaneous tissue disorders |                          |                      |
| Hyperpigmentation <sup>A [1] †</sup>   | 22/43 (51.16%)           | 31/50 (62%)          |

† Indicates events were collected by systematic assessment.

A Term from vocabulary, DeCS <http://decs.bvs>

[1] Dark pigmentation of skin after injection

## Limitations and Caveats

[Not specified]

## More Information

### Certain Agreements:

All Principal Investigators ARE employed by the organization sponsoring the study.

### Results Point of Contact:

Name/Official Title: Dr. Matheus Bertanha

Organization: UPECLIN

Phone: +55 14 38116305

Email: [matheus.fameca@ig.com.br](mailto:matheus.fameca@ig.com.br)
