# Supplementary material
Source: PubMed Central journal article supplement (PMC5817453)
Supplement: jamadermatol-153-1249-s002.pdf [file jamadermatol-153-1249-s002.pdf]

## Supplementary Online Content

Bertanha M, Jaldin RG, Moura R, et al. Sclerotherapy for reticular veins in the lower limbs: a triple-blind randomized clinical trial. *JAMA Dermatology*. Published online September 27, 2017. doi:10.1001/jamadermatol.2017.3426

**eTable.** CONSORT checklist

**eAppendix.** Additional study information [in Portuguese]

This supplementary material has been provided by the authors to give readers additional information about their work.

## CONSORT CHECKLIST

**eTable.** CONSORT 2010 Checklist of Information to Include When Reporting a Randomized Trial<sup>a</sup>

| Section and Topic                                                         | Item No. | Checklist Item                                                                                                                                                                              | Reported on Page No. |
|---------------------------------------------------------------------------|----------|---------------------------------------------------------------------------------------------------------------------------------------------------------------------------------------------|----------------------|
| <b>Title and abstract</b>                                                 | 1a       | Identification as a randomized trial in the title                                                                                                                                           | 1                    |
|                                                                           | 1b       | Structured summary of trial design, methods, results, and conclusions (for specific guidance see CONSORT for abstracts)                                                                     |                      |
| <b>Introduction</b><br>Background and objectives                          | 2a       | Scientific background and explanation of rationale                                                                                                                                          |                      |
|                                                                           | 2b       | Specific objectives or hypotheses                                                                                                                                                           |                      |
| <b>Methods</b><br>Trial design                                            | 3a       | Description of trial design (such as parallel, factorial) including allocation ratio                                                                                                        |                      |
|                                                                           | 3b       | Important changes to methods after trial commencement (such as eligibility criteria), with reasons                                                                                          |                      |
| Participants                                                              | 4a       | Eligibility criteria for participants                                                                                                                                                       |                      |
|                                                                           | 4b       | Settings and locations where the data were collected                                                                                                                                        |                      |
| Interventions                                                             | 5        | The interventions for each group with sufficient details to allow replication, including how and when they were actually administered                                                       |                      |
| Outcomes                                                                  | 6a       | Completely defined prespecified primary and secondary outcome measures, including how and when they were assessed                                                                           |                      |
|                                                                           | 6b       | Any changes to trial outcomes after the trial commenced, with reasons                                                                                                                       |                      |
| Sample size                                                               | 7a       | How sample size was determined                                                                                                                                                              |                      |
|                                                                           | 7b       | When applicable, explanation of any interim analyses and stopping guidelines                                                                                                                |                      |
| Randomization<br>Sequence generation                                      | 8a       | Method used to generate the random allocation sequence                                                                                                                                      |                      |
|                                                                           | 8b       | Type of randomization; details of any restriction (such as blocking and block size)                                                                                                         |                      |
| Allocation concealment mechanism                                          | 9        | Mechanism used to implement the random allocation sequence (such as sequentially numbered containers), describing any steps taken to conceal the sequence until interventions were assigned |                      |
| Implementation                                                            | 10       | Who generated the random allocation sequence, who enrolled participants, and who assigned participants to interventions                                                                     |                      |
| Blinding                                                                  | 11a      | If done, who was blinded after assignment to interventions (for example, participants, care providers, those assessing outcomes) and how                                                    |                      |
|                                                                           | 11b      | If relevant, description of the similarity of interventions                                                                                                                                 |                      |
| Statistical methods                                                       | 12a      | Statistical methods used to compare groups for primary and secondary outcomes                                                                                                               |                      |
|                                                                           | 12b      | Methods for additional analyses, such as subgroup analyses and adjusted analyses                                                                                                            |                      |
| <b>Results</b><br>Participant flow<br>(a diagram is strongly recommended) | 13a      | For each group, the numbers of participants who were randomly assigned, received intended treatment, and were analyzed for the primary outcome                                              |                      |
|                                                                           | 13b      | For each group, losses and exclusions after randomization, together with reasons                                                                                                            |                      |
| Recruitment                                                               | 14a      | Dates defining the periods of recruitment and follow-up                                                                                                                                     |                      |
|                                                                           | 14b      | Why the trial ended or was stopped                                                                                                                                                          |                      |
| Baseline data                                                             | 15       | A table showing baseline demographic and clinical characteristics for each group                                                                                                            |                      |
| Numbers analyzed                                                          | 16       | For each group, number of participants (denominator) included in each analysis and whether the analysis was by original assigned groups                                                     |                      |
| Outcomes and estimation                                                   | 17a      | For each primary and secondary outcome, results for each group, and the estimated effect size and its precision (such as 95% confidence interval)                                           |                      |
|                                                                           | 17b      | For binary outcomes, presentation of both absolute and relative effect sizes is recommended                                                                                                 |                      |
| Ancillary analyses                                                        | 18       | Results of any other analyses performed, including subgroup analyses and adjusted analyses, distinguishing prespecified from exploratory                                                    |                      |
| Harms                                                                     | 19       | All important harms or unintended effects in each group (for specific guidance see CONSORT for harms)                                                                                       |                      |
| <b>Comment</b><br>Limitations                                             | 20       | Trial limitations, addressing sources of potential bias, imprecision, and, if relevant, multiplicity of analyses                                                                            |                      |
|                                                                           | 21       | Generalizability (external validity, applicability) of the trial findings                                                                                                                   |                      |
|                                                                           | 22       | Interpretation consistent with results, balancing benefits and harms, and considering other relevant evidence                                                                               |                      |
| <b>Other information</b><br>Registration                                  | 23       | Registration number and name of trial registry                                                                                                                                              |                      |
| Protocol                                                                  | 24       | Where the full trial protocol can be accessed, if available                                                                                                                                 |                      |
| Funding                                                                   | 25       | Sources of funding and other support (such as supply of drugs), role of funders                                                                                                             |                      |

<sup>a</sup>We strongly recommend reading this statement in conjunction with the CONSORT 2010 Explanation and Elaboration for important clarifications on all the items. If relevant, we also recommend reading CONSORT extensions for cluster randomized trials, noninferiority and equivalence trials, nonpharmacological treatments, herbal interventions, and pragmatic trials. Additional extensions are forthcoming: for those and for up-to-date references relevant to this checklist, see <http://www.consort-statement.org>.

eAppendix

**ESTUDO CLÍNICO RANDOMIZADO E DUPLO CEGO COMPARANDO DOIS**

**MÉTODOS DE ESCLEROTERAPIA PARA VEIAS RETICULARES E**

**TELANGIECTASIAS EM MEMBROS INFERIORES.**

Comite de Ética  
em Pesquisa

Fis. nº 10

**Autores:**

**Matheus Bertanha. \*\***

**Fernando Cordeiro Pimentel. \***

**Marcone Lima Sobreira. \*\*\***

**Regina Moura. \*\*\***

**Winston Bonetti Yoshida. \*\*\*\*\***

**Hamilton Almeida Rollo. \*\*\*\***

**Disciplina de Cirurgia Vascular, Depto de Cirurgia e Ortopedia**

**Faculdade de Medicina de Botucatu. - UNESP.**

**\* Médico Contratado da Disciplina de Cirurgia Vascular, Depto de Cirurgia e Ortopedia.**

**\*\* Professor Assistente da Disciplina de Cirurgia Vascular, Depto de Cirurgia e Ortopedia.**

**\*\*\* Professor Assistente Doutor de Cirurgia Vascular, Depto de Cirurgia e Ortopedia.**

**\*\*\*\* Professor Adjunto de Cirurgia Vascular, Depto de Cirurgia e Ortopedia.**

**\*\*\*\*\* Professor Titular de Cirurgia Vascular, Depto de Cirurgia e Ortopedia.**

**Endereço**

**Matheus Bertanha**

**Depto de Cirurgia e Ortopedia, Faculdade de Medicina de Botucatu – UNESP**

**Campus de Botucatu CEP 18.618-970**

**Telefones: 3811 6269**

**FAX: 3815 7428**

**e-mail : matheus.fameca@ig.com.br**

## RESUMO

*Introdução:* As varizes de membros inferiores têm prevalência geral estimada em 57,5% nas mulheres e de 80 a 90% quando se pesquisa veias reticulares e telangiectasias entre as mesmas. O tratamento estético destas alterações é muito frequente nos consultórios dos Angiologistas e Cirurgiões Vasculares. Dentre as inúmeras técnicas para o tratamento das telangiectasias destaca-se a escleroterapia química que visa à lesão endotelial e obliteração dos vasos esclerosados. Para as varizes reticulares ainda não há consenso e são poucas as publicações mostrando os resultados do tratamento por escleroterapia, o que justifica este trabalho. *Objetivo:* Avaliar dois métodos de escleroterapia química como forma de tratamento para telangiectasias e veias reticulares em membros inferiores. *Casística e Métodos:* Será feito estudo prospectivo, controlado, randomizado e duplo cego. A amostra será de conveniência e contínua de pacientes do sexo feminino que procurarem o Serviço com telangiectasias e/ou veias reticulares. Serão randomizados 200 membros inferiores dessas pacientes para o tratamento com glicose 75% ou mistura de 1 ml de polidocanol 1% com 4 ml de glicose 75%. A área de tratamento foi definida como a região posterior do joelho limitada anatomicamente pelo retângulo padronizado com largura de 10cm e comprimento de 40cm (área de 400cm<sup>2</sup>) usando transparência com 1600 círculos de 2 mm de diâmetro impressos. O tratamento será realizado em uma única sessão na área determinada visando tratar todas as veias reticulares e telangiectasias. A contagem de círculos atravessando-os ou tangenciando-os será usada para avaliação objetiva da eficácia dos métodos. A área também será fotografada e avaliada por dois cirurgiões vasculares independentes comparando a imagem antes do tratamento com 21 e 60 dias após o tratamento. Além disso, a segurança dos dois métodos será avaliada por meio de

observação de discromias, úlceras, hematomas, flebites, trombose, hipertrofia entre outros. A análise estatística dos resultados será feita pela comparação de proporções pelo teste de Fisher com significância de 5%.

**Palavras chave:** Telangiectasias. Varizes. Escleroterapia.

## 1. INTRODUÇÃO

As varizes são veias tortuosas e dilatadas nos membros inferiores com perda da sua função, constituindo a alterações vasculares mais comuns. (1) Através da classificação CEAP (Anexo 1) a insuficiência venosa crônica pode ser classificada desde telangiectasias e veias reticulares (CEAP 1) até casos mais graves com varizes complicadas com alterações tróficas de extremidades (CEAP 6). Estudos realizados no Brasil, apontam a incidência de varizes em cerca de 57,5% em mulheres e 34,4% em homens (somente incluindo as classificações CEAP 2 a 6) na população com idade maior que 15 anos. (1, 2) Telangiectasias são vênulas ou capilares intra-dérmicas dilatadas, sendo também consideradas como microvarizes, com diâmetro máximo de 1 mm, coloração avermelhada ou azulada e que causam apenas desconforto estético. Podem apresentar-se em aglomerados com aspecto de "chuveiro" ou "aranhas", geralmente por possuir uma veia subcutânea de maior calibre como sua nutridora, colaborando para que constantemente elas aumentem em número. Sua etiologia parece estar associada com o hormônio estrogênio (3). Sua incidência chega a 80 a 90% da população feminina, sendo que geralmente não provoca dor, mas quando em grande número pode ser responsável por dor tipo queimação nas regiões mais afetadas, que piora no período menstrual (4). O comprometimento maior é o incômodo estético, sendo queixa freqüente entre as pacientes no consultório do angiologista e do cirurgião vascular.

As veias reticulares são pequenas varizes com diâmetro entre 1 e 3mm, retilíneas ou tortuosas de coloração azulada situadas no tecido celular subcutâneo dos membros inferiores (5). São intermediárias entre as varizes propriamente ditas e as telangiectasias

(1)

Para os casos com classificação CEAP 1, diversas técnicas de tratamento tem seu uso amplamente difundido na prática clínica, sendo o mais comum a escleroterapia química (6). A escleroterapia consiste da aplicação de um agente esclerosante intraluminal, com objetivo de provocar lesão endotelial, obliteração da luz dessas veias e seu desaparecimento (6). A agressão endotelial resulta na exposição do colágeno subendotelial, agregação plaquetária e trombose com subsequente organização e fibrose (7). As soluções esclerosantes podem ser divididas em três categorias de ação: detergente, osmótico e composto (8). As soluções detergentes como o polidocanol, atuam nos lipídeos da parede celular, destruindo cimento celular, causando maceração e descamação em placas, sendo estas muito potentes e fluidas, fáceis de injetar e com alto fluxo, o que aumenta sua potência (9, 10) e também o risco de complicações, como necrose, manchas de hiperpigmentação (3, 11). Apresentam risco de reações alérgicas e podem provocar de alterações sistêmicas quando usadas em concentrações e volumes indevidos, principalmente quando diluída em ar (micro bolhas), como dor precordial, tosse, escotomas, e embolização gasosa. Sua diluição pode ser feita com água destilada, glicose e ar e a concentração pode variar de 0,1 a 50% (11). As soluções osmóticas hipertônicas como a glicose a 50 - 75% atuam causando a desidratação das células endoteliais, levando a sua destruição. São as mais utilizadas, por se considerar que apresentam baixo custo e serem isentas de complicações graves como alergia, embolização e necroses (12-14). As soluções compostas, como a glicerina cromada, agem por lesão direta ao endotélio, provocando fissuras no mesmo e agredindo o cimento celular (1). Como complicações, podem causar alergia e em 5% dos pacientes podem levar a formação de nódulos intradérmicos até 5 meses após a aplicação. Outras técnicas conhecidas de escleroterapia são a crioescleroterapia que associa a esclerose



química osmótica da glicose hipertônica com a ação térmica do líquido a baixas temperaturas (-50 a -20°C) e não química que inclui a fotodermólise por laser, a eletrocoagulação e a radiofrequência (3, 15).

A escleroterapia química é pouco dolorosa podendo ser feita sem a necessidade de anestesia e costuma ser bem tolerada pelos pacientes, com pronta recuperação.

Porém, o tratamento escleroterápico das varizes reticulares é controverso e, devido a possibilidade da ocorrência de manchas, muitos profissionais ainda preferem a exérese cirúrgica.

Estudos recentes vêm apresentando Polidocanol em diversas formas de diluição como superior à glicose para escleroterapia (11, 16) e resultados de experiência pessoal aventando a superioridade da mistura de polidocanol 0,2% acrescido em glicose 60% para tratamento de veias reticulares e telangiectasias para oclusão dos vasos e com pouca frequência de discromias e efeitos colaterais.

Tendo em vista ser uma formulação pioneira composta por produtos amplamente testados individualmente, foi então proposta realização deste trabalho, visando verificar o real benefício desta formulação e técnica nos pacientes com varizes CEAP 1, realizando-se estudo clínico controlado, prospectivo e duplo cego comparando-se a eficiência e segurança desta formulação em comparação com a técnica convencional.

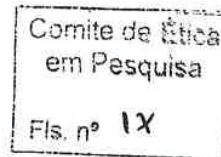

## 2. CASUÍSTICA E MÉTODOS

### 2.1 Desenho

Estudo clínico prospectivo, controlado, randomizado, duplo cego.

### 2.2 Local

Setor de Cirurgia Ambulatorial do Hospital das Clínicas da Faculdade de Medicina de Botucatu – UNESP (HC FMB UNESP).

### 2.3 Amostra

A amostra será de conveniência, contando com pacientes que procurarem o Hospital das Clínicas da Faculdade de Medicina de Botucatu – UNESP (HC FMB UNESP) para tratamento de varizes CEAP 1 de forma consecutiva. O tamanho da amostra foi calculado em 100 tratamentos para cada grupo, totalizando 200 tratamentos. A área do membro inferior delimitada como de interesse para o estudo será a região posterior do joelho, onde se utilizará uma transparência, com área de  $400 \text{ cm}^2$  (10 cm de largura por 40 cm de comprimento) e com 1600 círculos de 2 mm de diâmetro impressos com 3 mm de distância entre os mesmos. Os círculos com vasos atravessando-os ou tangenciando-os serão contados. Esta transparência será posicionada 25cm acima da linha plantar e 2 cm posterior a fibula, sendo esta área representativa do membro (Anexo 2). Cada paciente poderá ter até dois tratamentos no total, sendo cada tratamento em tempo diferente, e randomizados totalmente separadamente.

Serão incluídos o número de pacientes necessárias para que se possa obter 200 áreas para a realização da pesquisa forma independente.

## 2.4 Critérios de Inclusão

Sexo feminino; ser portadora de varizes CEAP 1; idade mínima de 18 anos; idade máxima de 69 anos; apresentar pelo menos uma veia reticula com pelo menos 3 cm de comprimento em qualquer uma das áreas estipuladas para o tratamento; concordar com os termos de execução da pesquisa; assinar o termo de consentimento livre e esclarecido TCLE). (Anexo 3).

## 2.5 Critérios de Exclusão

Sexo masculino; idade inferior a 18 anos; idade superior a 70 anos; apresentar varizes CEAP 2 ou mais; insuficiência arterial clinicamente; alergia a qualquer medicamento que possa ter relação com os medicamentos do estudo; alergia em escleroterapia prévia; dermatites nos locais de aplicação; portador de comorbidade descompensada clinicamente; gravidez; puerpério; uso de antiagregantes, uso de anticoagulantes.

## 2.6 Randomização

A randomização foi elaborada por um técnico, utilizando programa de construção de tabelas numéricas aleatórias no site [HTTP://stattrek.com/Tables/Random.aspx](http://stattrek.com/Tables/Random.aspx) no dia 17/01/2012 contendo 300 números aleatorizados de 001 a 002.

Determina-se então que 001 representa o tratamento com POLIDOCANOL 0,2% + GLICOSE 60% (A) e 002 representa o tratamento com GLICOSE 75% (B). Uma enfermeira prepara as seringas seqüencialmente de acordo com a tabela cujo conteúdo ela dispõe. Cada membro inferior incluído no estudo receberá um número consecutivo de 001

até obtermos 300, randomizados seguindo a seqüência sorteada, sendo esta tabela de identificação feita em duas vias e colocadas em envelopes opacos lacrados.

## 2.7 Procedimentos

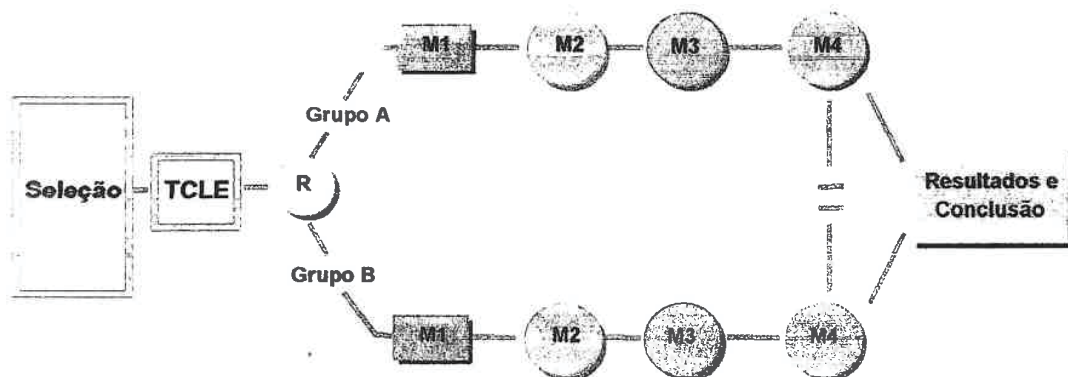

**Figura 1** – Representação esquemática do desenvolvimento da pesquisa.

Os pacientes serão agendados para uma avaliação ambulatorial inicial. Neste dia (primeira visita) serão convidados a participar do estudo e receberão todas as informações detalhadamente referentes à pesquisa. Se concordarem, serão solicitados a assinar o TCLE (Anexo 3) em duas vias, sendo que uma cópia será entregue ao paciente.

Serão então clinicamente avaliados, observados todos os critérios de inclusão e exclusão, será preenchida a ficha de avaliação inicial (Ficha 1 – Anexo 4). Estando o paciente elegível a participar do estudo, o mesmo será randomizado e agendada segunda visita com finalidade de efetuar o tratamento.

Os pacientes não incluídos serão encaminhados a ambulatório apropriado para seu atendimento.

Na segunda visita (M1), os pacientes terão a área de aplicação delimitada pelo sistema de transparência, com contagem dos círculos e realização de fotografia com distância e equipamento padronizados. (Anexo 5).

Receberão então o tratamento duplo cego. Será preenchida ficha 2 de acompanhamento contendo informações relevantes ao dia da aplicação (Ficha 2 – Anexo 6). Receberão uma folha com as orientações por escrito (Anexo 7) e que serão também explicadas verbalmente. Serão convidados a responder ao questionário nº1 referente a dor do tratamento realizado (Anexo 8). Será agendado o próximo retorno.

Na terceira visita (M2), 21 dias após a sessão de aplicação, será preenchida a segunda parte da ficha 2 referente ao primeiro retorno (Ficha 2 – Anexo 6). Será realizada nova fotografia (imagem 2 - 21 dias pós tratamento) e quantificação das veias na área tratada com a mesma técnica de transparência (Anexo 5).

Na quarta visita (M3) 60 dias após a sessão de aplicação, será preenchida a terceira parte da ficha 2 referente ao segundo retorno (Ficha 2 – Anexo 6). Será realizada nova fotografia (imagem 3 - 60 dias pós tratamento) e quantificação das manchas na área tratada com a mesma transparência (Anexo 5). Finaliza-se o estudo proposto e novos retornos para complementações poderão ser agendados, sem objetivo para o estudo.

As fotografias serão avaliadas por dois avaliadores externos e os dados contidos nas fichas 1 e 2 serão compilados (M4).

Após o conhecimento dos resultados, será redigido artigo científico para publicação em periódico médico e apresentação em congressos. Os resultados parciais e as fotografias não serão divulgados e qualquer representação científica não terá a identificação do paciente.

Todas estas etapas foram representadas na Figura 1.

### 2.7.1 Técnica de mascaramento

A enfermeira responsável pela preparação das medicações receberá ampolas de glicose 75% com 10ml, ampolas de Polidocanol 1% 2ml, seringas de 10ml, agulha 40X12, papel colante para identificação das seringas. Ela colocará a identificação da paciente na seringa com o colante seguindo rigorosamente a lista de randomização. Para as randomizadas no grupo 001, aspirará 1 ml de POLIDOCANOL 1% e 4 ml de GLICOSE 75% (solução contendo Polidocanol 0,2% e Glicose 60%) e para as pacientes randomizadas no grupo 002 aspirará 5ml de GLICOSE 75%. Depois de devidamente preparados, os medicamentos serão entregues para a equipe do estudo. Dessa forma, como os medicamentos apresentam a mesma coloração translúcida, mesmo volume e viscosidade semelhante. O médico do estudo passará a para outra seringa, de 3 ml, com a qual fará as aplicações.

A técnica de preparo dos medicamentos seguirá normas rigorosas de anti-sepsia.

### 2.7.2 Técnica de tratamento

Os dois grupos serão tratados da mesma maneira, objetivando a eliminação de todos os vasos contidos na área delimitada pelo esquadro de papel.

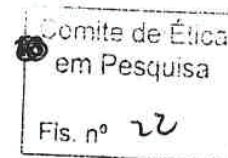

Todos os procedimentos realizados nos pacientes da pesquisa serão realizados por seus integrantes e colaboradores, além de contar com a participação dos Médicos Residentes em Cirurgia Vascular.

Serão obedecidas as técnicas de escleroterapia convencional, com injeções em velocidade e volume controlados e evitando o extravasamento do líquido para o subcutâneo. O número de aplicações na área tratada será no máximo de 40 com volume total máximo de 5ml, com volume por injeção não superior a 2ml nas veias reticulares e não superior a 0,3ml nas telangiectasias, com velocidade de infusão lenta. Será utilizada seringa BD® de 3ml com rosca e agulha Terumo® 13X4,0 (27 G1/2) para aplicação. As punções serão recobertas por uma bolinha de algodão de aproximadamente 0,3cm de diâmetro com um pedaço retangular de Micropore de aproximadamente 2X3cm imediatamente após a aplicação, evitando a perda do líquido aplicado e a saída de sangue. Após o término das aplicações, a região tratada ficará sobre elastocompressão com faixa elástica de 1,5 m de comprimento por 10 cm de largura com curativo semicompressivo da marca Atadress® por 3 dias somente durante o dia.

Todas as flebites identificadas no primeiro retorno serão drenadas após a fotografia, utilizando micro punções aspirativas com agulha 13 X 4,5 BD® e vácuo de seringa BD® de 10ml, além de massagem compressiva para drenagem final.

### **3. Desfechos**

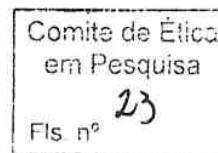

#### **3.1 Desfechos de eficácia**

Serão considerados os desfechos de eficácia, a proporção mensurada objetivamente de vasos ocluídos obtidos pela análise com a transparência especificada e subjetivamente pela análise dos observadores das fotografias (imagens 1,2 e 3). Ainda serão considerados o número de injeções pelo número de vasos da área tratada o volume de medicação pela área tratada.

#### **3.2 Desfechos de segurança**

Serão avaliados o número de manchas hiperocrômicas ou hipocrômicas pelo número de vasos tratados; dor relacionada pela paciente; ocorrência de eventos maiores como TVP; Embolia Pulmonar; síncope; amaurose fugaz; eventos cardíacos, flebites pelo número de veias tratadas; alterações sensitivas; úlceras de pele; óbito entre outros.

#### **3.3 Saída antecipada, encerramento e reposição:**

O paciente terá o direito de sair do estudo a qualquer momento pelas seguintes razões a seguir:

- A paciente retira seu consentimento para participação do estudo.
- A paciente apresente um efeito adverso que obriga sua retirada do estudo.
- A paciente refere gravidez antes do tratamento.
- Descontinuação do estudo pelo comitê de ética ou por um órgão regulatório
- Outros.



Os pacientes que saírem do estudo até o momento do registro dos resultados em qualquer dos retornos poderão ser repostos de forma que 200 membros sejam tratados

Comite de Ética em Pesquisa  
Fls. nº 24

**3.4 Análise dos dados obtidos**

A região tratada será avaliada individualmente. As fotografias serão avaliadas por dois avaliadores externos ao trabalho, cujas avaliações serão comparadas pelo teste de Kappa. Os demais dados de evolução e da contagem objetiva do número de varizes reticulares e telangiectasias pré e pós-tratamento e do número de manchas por hiperpigmentação serão compilados em planilha para análise estatística. Os resultados subjetivos serão classificados em três níveis de resultado: bom, regular e ruim.

A análise estatística será realizada de forma padronizada para as variáveis qualitativas, cujo interesse é comparar proporções, utilizando o teste do qui-quadrado ou o teste Exato de Fisher e caso haja diferenças estatisticamente significativas entre as proporções será utilizado o teste de Goodmann. Para as variáveis quantitativas que apresentarem distribuição normal e homogeneidade de variâncias será utilizada a análise de variância no delineamento inteiramente ao acaso, seguida do método de Tukey, caso haja diferenças significativas entre as médias, mas em caso contrário será utilizado o teste de Kruskal-Wallis, seguido do teste de Dunn, quando necessário. Para as variáveis quantitativas cujo interesse é comparar grupos e momentos, será utilizada a análise de perfil. Para o estudo da correlação entre as variáveis de interesse será utilizado o coeficiente de correlação de Pearson ou o de Spearman. O nível de significância utilizado será de 5%.

#### 4 Planejamento

Comite de Ética  
em Pesquisa  
Fls. nº 25

Tabela 3 – Atividades do Estudo

| PROCEDIMENTO                       | ELABORAÇÃO | SELEÇÃO | M1 | M2 | M3 | M4 | RESULTADO | ANÁLISES |
|------------------------------------|------------|---------|----|----|----|----|-----------|----------|
| Randomização e cegamento           | X          | X       |    |    |    |    |           |          |
| Critérios de inclusão e exclusão   |            | X       |    |    |    |    |           |          |
| Consentimento                      |            | X       |    |    |    |    |           |          |
| Histórico médico                   |            | X       |    |    |    |    |           |          |
| Exame físico                       |            | X       | X  | X  | X  |    |           |          |
| Fotografia                         |            |         | X  | X  | X  |    |           |          |
| Tratamento do estudo               |            |         | X  |    |    |    |           |          |
| Formulário acompanhamento paciente |            |         | X  | X  | X  |    |           |          |
| Formulário de Dor                  |            |         | X  |    |    |    |           |          |
| Avaliador interno/externo          |            |         |    |    |    | X  | X         |          |
| Revelação dos resultados           |            |         |    |    |    |    | X         | X        |
| Publicação                         |            |         |    |    |    |    |           | X        |

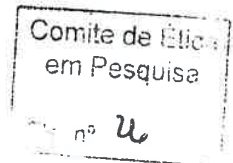

## 5 Referencias Bibliográficas

1. Maffei FHA. Doenças Vasculares Periféricas. 4 ed. Rio de Janeiro: Guanabara Koogan; 2008.
2. Evans CJ, Fowkes FG, Hajivassiliou CA, Harper DR, Ruckley CV. Epidemiology of varicose veins. A review. *Int Angiol.* 1994 Sep;13(3):263-70.
3. Goldman MP, Sadick NS, Weiss RA. Cutaneous necrosis, telangiectatic matting, and hyperpigmentation following sclerotherapy. Etiology, prevention, and treatment. *Dermatol Surg.* 1995 Jan;21(1):19-29; quiz 31-2.
4. Rutherford RB. *Cirurgia Vascolar.* New York: Elsevier.
5. Miyake RK, Zeman HD, Duarte FH, Kikuchi R, Ramacciotti E, Lovhoiden G, et al. Vein imaging: a new method of near infrared imaging, where a processed image is projected onto the skin for the enhancement of vein treatment. *Dermatol Surg.* 2006 Aug;32(8):1031-8.
6. Schwartz L, Maxwell H. Sclerotherapy for lower limb telangiectasias. *Cochrane Database Syst Rev.* 2011;12:CD008826.
7. Arnoldi CC. The aetiology of primary varicose veins. *Dan Med Bull.* 1957 May;4(3):102-7.
8. Imhoff E, Stemmer R. [Classification and mechanism of action of sclerosing agents]. *Phlebologie.* 1969 Apr-Jun;22(2):145-8.
9. Tessari L, Cavezzi A, Frullini A. Preliminary experience with a new sclerosing foam in the treatment of varicose veins. *Dermatol Surg.* 2001 Jan;27(1):58-60.
10. Cabrera J, Cabrera J, Jr., Garcia-Olmedo MA, Redondo P. Treatment of venous malformations with sclerosant in microfoam form. *Arch Dermatol.* 2003 Nov;139(11):1409-16.
11. B VAND, Ceulen RP, Tellings SS, C VDG, Nijsten T. Polidocanol concentration and time affect the properties of foam used for sclerotherapy. *Dermatol Surg.* 2011 Oct;37(10):1448-55.
12. Bessereau J, Coulange M, Boussuges A, Chenaitia H, Michelet P. Iatrogenic gas embolism after foam sclerotherapy? *Ann Fr Anesth Reanim.* 2011 Sep;30(9):e31.
13. Grommes J, Franzen EL, Binnebosel M, Toonder IM, Wittens C, Jacobs M, et al. Inadvertent arterial injection using catheter-assisted sclerotherapy resulting in amputation. *Dermatol Surg.* 2011 Apr;37(4):536-8.

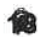

Comite de Ética  
em Pesquisa  
Fls. nº 1X

14. Parsi K. Paradoxical embolism, stroke and sclerotherapy. *Phlebology*. 2011 Sep 2.
15. Yilmaz S, Ceken K, Alparslan A, Durmaz S, Sindel T. Endovenous Laser Ablation and Concomitant Foam Sclerotherapy: Experience in 504 Patients. *Cardiovasc Intervent Radiol*. 2011 Dec 14.
16. Partsch B. [Foam sclerotherapy]. *Ther Umsch*. 2011 Mar;68(3):159-62.

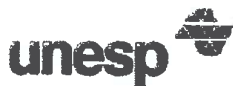

Universidade Estadual Paulista  
Faculdade de Medicina de Botucatu

Distrito Rubião Junior, s/nº - Botucatu - S.P.  
CEP: 18.618-970  
Fone/Fax: (0xx14) 3811-6143  
e-mail secretaria: capellup@fmb.unesp.br  
e-mail coordenadoria: tsarden@fmb.unesp.br

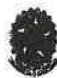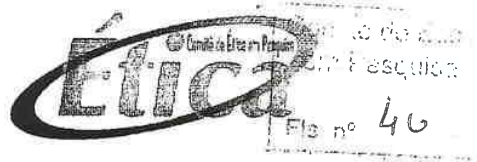

Registrado no Ministério da Saúde  
em 30 de abril de 1997

Botucatu, 05 de março de 2012

Of. 56/2012

Ilustríssimo Senhor  
Prof. Titular Winston B. Yoshida  
Departamento de Cirurgia e Ortopedia da  
Faculdade de Medicina de Botucatu

Prezado Dr. Winston,

De ordem do Senhor Coordenador deste CEP, informo que o Projeto de Pesquisa (Protocolo CEP 4127-2012) "Estudo clínico randomizado e duplo cego comparando dois métodos de escleroterapia para veias reticulares e telangiectasias em membros inferiores", a ser conduzido por Matheus Bertanha, orientado por Vossa Senhoria, com a colaboração de Marcone Lima Sobreira, Fernando Cordeiro Pimentel, Hamilton de Almeida Rollo e Regina Moura, recebeu do relator parecer favorável, aprovado em reunião de 05/03/2012.

Situação do Projeto: **APROVADO**. Os pesquisadores deverão apresentar ao CEP ao final da execução do Projeto o "Relatório Final de Atividades".

Atenciosamente,

  
Alberto Santos Capelluppi  
Secretário do CEP

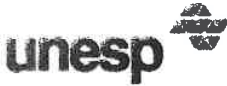

Universidade Estadual Paulista  
Faculdade de Medicina de Botucatu

Distrito Rubião Junior, s/nº - Botucatu - S.P.  
CEP: 18.618-970  
Fone: (14) 3880-1608 / 3880-1609  
e-mail secretaria: [capellup@fmb.unesp.br](mailto:capellup@fmb.unesp.br)  
                                  [kleber@fmb.unesp.br](mailto:kleber@fmb.unesp.br)  
e-mail coordenadoria: [tsarden@fmb.unesp.br](mailto:tsarden@fmb.unesp.br)

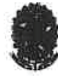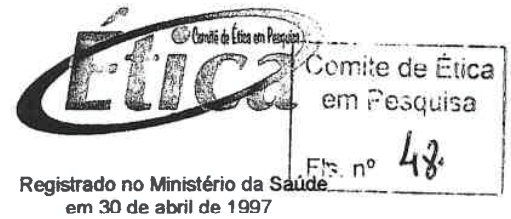

Botucatu, 27 de março de 2014

Of. 38/2014-CEP

Ilustríssimo Senhor  
Prof. Dr. Marcone de Lima Sobreira  
Departamento de Cirurgia e Ortopedia  
Faculdade de Medicina de Botucatu

Caro Prof. Marcone,

De ordem do Senhor Coordenador deste CEP, informo que foi autorizada a mudança de orientação ao Projeto de Pesquisa "Protocolo CEP 4127/2012" "Estudo clínico randomizado e duplo cego comparando dois métodos de escleroterapia para veias reticulares e telangiectasias em membros inferiores" aprovado por este colegiado aos 05/03/2012, ficando a equipe de estudo assim constituída:

**Autor:** Dr. Matheus Bertanha - Objetivo Tese de Doutorado.

**Orientador:** Prof. Dr. Marcone Lima Sobreira

**Colaboradores:** Fernando Cordeiro Pimental, Hamilton de Almeida Rollo e Regina Moura.

Atenciosamente,



Alberto Santos Capelluppi  
Secretário do CEP.
